# Supplementary material
Source: PubMed Central journal article supplement (PMC10408595)
Supplement: ehp12351.s001.acco.pdf [file ehp12351.s001.acco.pdf]

**Note to readers with disabilities:** *EHP* strives to ensure that all journal content is accessible to all readers. However, some figures and Supplemental Material published in *EHP* articles may not conform to [508 standards](#) due to the complexity of the information being presented. If you need assistance accessing journal content, please contact [ehp508@niehs.nih.gov](mailto:ehp508@niehs.nih.gov). Our staff will work with you to assess and meet your accessibility needs within 3 working days.

### **Supplemental Material**

#### **Per- and Polyfluoroalkyl Substances (PFAS) and Lipid Trajectories in Women 45–56 Years of Age: The Study of Women’s Health Across the Nation**

Habyeong Kang, Ning Ding, Carrie A. Karvonen-Gutierrez, Bhramar Mukherjee, Antonia M. Calafat, and Sung Kyun Park

#### **Table of Contents**

**Table S1.** Detection frequencies and concentrations of serum PFAS in the SWAN-MPS cohort (1999–2016, n = 1130).

**Table S2.** Timeline of measurements of variables used in this study.

**Table S3.** Constant values added to measured lipid concentrations (mg/dL) for those with the statin or non-statin medication depending on race/ethnicity (Wu et al. 2007).

**Table S4.** Criteria to select a best model for total cholesterol trajectories in the SWAN-MPS cohort (1999–2016, n = 1130, adding constant methods).

**Table S5.** Criteria to select a best model for LDL cholesterol trajectories in the SWAN-MPS cohort (1999–2016, n = 1130, adding constant methods).

**Table S6.** Criteria to select a best model for HDL cholesterol trajectories in the SWAN-MPS cohort (1999–2016, n = 1130, adding constant methods).

**Table S7.** Criteria to select a best model for triglycerides trajectories in the SWAN-MPS cohort (1999–2016, n = 1130, adding constant methods).

**Table S8.** Classification of study participants in the SWAN-MPS cohort (1999–2016, n = 1130) by lipids trajectories from two different methods (Adding constant and covariate methods).

**Table S9.** Associations of serum concentrations of total PFOS, PFDA, PFUnDA, MeFOSAA, and EtFOSAA with trajectories of total cholesterol, LDL cholesterol, HDL cholesterol, and triglycerides in the SWAN-MPS cohort (1999–2016, n = 1130).

**Table S10.** Associations of tertiles of serum PFAS concentrations with total cholesterol trajectories in the SWAN-MPS cohort (1999–2016, n = 1130).

**Table S11.** Associations of tertiles of serum PFAS concentrations with LDL cholesterol trajectories in the SWAN-MPS cohort (1999–2016, n = 1130).

**Table S12.** Associations of tertiles of serum PFAS concentrations with HDL cholesterol trajectories in the SWAN-MPS cohort (1999–2016, n = 1130).

**Table S13.** Associations of tertiles of serum PFAS concentrations with triglycerides trajectories in the SWAN-MPS cohort (1999–2016, n = 1130).

**Table S14.** Associations of serum PFAS concentrations with trajectories of total cholesterol, LDL cholesterol, HDL cholesterol, and triglycerides when the models were not adjusted for BMI in the SWAN-MPS cohort (1999–2016, n = 1130).

**Table S15.** Cross-sectional association of serum PFAS concentrations (ng/mL) with blood lipid levels at baseline (mg/dL) in the SWAN-MPS cohort (1999–2016, n = 1130).

**Table S16.** Association of serum PFAS concentrations (ng/mL) with rate of change in blood lipid levels during follow-up (mg/dL/year) in the SWAN-MPS cohort (1999–2016, n = 1130).

### **Method for literature review of studies on the association of PFAS exposure with lipids**

**Table S17.** Summary of results of selected epidemiological studies on associations between PFAS and lipids.

**Figure S1.** Spearman's correlations between serum PFAS concentrations in the SWAN-MPS cohort (1999–2016, n = 1130).

**Figure S2.** Trajectories of (A) total cholesterol, (B) LDL cholesterol, (C) HDL cholesterol, and (D) triglycerides identified by latent class growth model in the SWAN-MPS cohort (1999–2016, n = 1130). ‘Covariate method’ (described in the Methods of the main text) was applied to consider lipid-lowering medication effects.

**Figure S3.** Odds ratios (●) and their 95% confidence intervals (bar) for associations of tertiles of PFAS concentrations (versus tertile 1) or PFAS mixture (versus low concentration) with trajectories (high versus low trajectories) of (A) total cholesterol, (B) LDL cholesterol, (C) HDL cholesterol, and (D) triglycerides when the models were not adjusted for BMI in the SWAN-MPS cohort (1999–2016, n = 1130). The models were adjusted for site × race/ethnicity, age, education, menopausal status, smoking status, alcohol consumption, physical activity, and total energy intake. The numbers at the right side of the bars represent odds ratios and their 95% confidence intervals. Results with continuous PFAS concentrations can be found in supplemental Table S14.

**Figure S4.** Means of the standardized log-transformed serum PFAS concentrations in each cluster identified by k-means clustering in the SWAN-MPS cohort (1999–2016, n = 1130). Cluster 1 (n=291): “low” overall PFAS concentration pattern; clusters 2 (n=569): “medium” overall PFAS concentration pattern; cluster 3 (n=270): “high” overall PFAS concentration pattern.

### **References**

**Table S1.** Detection frequencies and concentrations of serum PFAS in the SWAN-MPS cohort (1999–2016, n = 1130).

|         | Detected frequency |      | Concentration (ng/mL) |              |        |              |         |
|---------|--------------------|------|-----------------------|--------------|--------|--------------|---------|
|         | n                  | %    | Geometric mean        | 1st quartile | Median | 3rd quartile | Maximum |
| n- PFOA | 1129               | 99.9 | 4.1                   | 2.8          | 4.1    | 5.8          | 56.5    |
| PFNA    | 1096               | 97.0 | 0.5                   | 0.4          | 0.6    | 0.8          | 4.4     |
| PFDA    | 456                | 40.4 | -                     | <0.1         | <0.1   | 0.2          | 2.6     |
| PFUnDA  | 352                | 31.2 | -                     | <0.1         | <0.1   | 0.2          | 3.8     |
| PFDoDA  | 39                 | 3.5  | -                     | <0.1         | <0.1   | <0.1         | 2.6     |
| n-PFOS  | 1129               | 99.9 | 17.7                  | 12.5         | 17.4   | 24.4         | 250     |
| Sm-PFOS | 1128               | 99.8 | 7.2                   | 4.7          | 7.3    | 11.0         | 126.0   |
| PFHxS   | 1125               | 99.6 | 1.6                   | 1.0          | 1.5    | 2.4          | 46.5    |
| MeFOSAA | 1127               | 99.7 | 1.5                   | 0.9          | 1.5    | 2.3          | 11.5    |
| EtFOSAA | 1120               | 99.1 | 1.3                   | 0.7          | 1.2    | 2.2          | 112.5   |



**Table S3.** Constant values added to measured lipid concentrations (mg/dL) for those with the statin or non-statin medication depending on race/ethnicity (Wu et al. 2007).

|                   | Statin medication |       |                     | Non-statin medication |       |                     |
|-------------------|-------------------|-------|---------------------|-----------------------|-------|---------------------|
|                   | White             | Black | Chinese or Japanese | White                 | Black | Chinese or Japanese |
| Total cholesterol | +50.7             | +50.7 | +50.7               | +46.1                 | +20.1 | +20.1               |
| LDL cholesterol   | +48.1             | +48.1 | +48.1               | +40.1                 | +11.4 | +11.4               |
| HDL cholesterol   | -2.3              | -0.4  | -2.0                | -5.9                  | -3.1  | -3.1                |
| Triglycerides     | +19.7             | +19.7 | +19.7               | +59.0                 | +59.0 | +59.0               |

**Table S4.** Criteria to select a best model for total cholesterol trajectories in the SWAN-MPS cohort (1999–2016, n = 1130, adding constant methods).

|                        | Number of Class = 2   |       |                               | Number of Class = 3   |              |                               | Number of Class = 4   |       |                               |
|------------------------|-----------------------|-------|-------------------------------|-----------------------|--------------|-------------------------------|-----------------------|-------|-------------------------------|
|                        | Smallest membership % | BIC   | Average posterior probability | Smallest membership % | BIC          | Average posterior probability | Smallest membership % | BIC   | Average posterior probability |
| Polynomial             |                       |       |                               |                       |              |                               |                       |       |                               |
| Linear                 | 39%                   | 99460 | 0.971                         | 19%                   | 97728        | 0.946                         | 8%                    | 96868 | 0.475                         |
| +quadratic             | 39%                   | 99379 | 0.971                         | 19%                   | 97625        | 0.946                         | 8%                    | 96762 | 0.291                         |
| +cubic                 | 39%                   | 99370 | 0.971                         | 19%                   | 97609        | 0.947                         | 8%                    | 96752 | 0.478                         |
| Natural cubic spline   |                       |       |                               |                       |              |                               |                       |       |                               |
| 2 knots (tertile)      | 39%                   | 99374 | 0.971                         | 19%                   | 97614        | 0.947                         | 8%                    | 96756 | 0.377                         |
| 2 knots (equidistance) | 39%                   | 99363 | 0.971                         | 19%                   | <b>97602</b> | 0.947                         | 8%                    | 96744 | 0.452                         |
| 3 knots (quartile)     | 39%                   | 99377 | 0.971                         | 19%                   | 97621        | 0.947                         | 8%                    | 96769 | 0.452                         |
| 3 knots (equidistance) | 39%                   | 99371 | 0.971                         | 19%                   | 97615        | 0.947                         | 8%                    | 96757 | 0.672                         |
| 4 knots (quintile)     | 39%                   | 99393 | 0.971                         | 19%                   | 97645        | 0.947                         | 8%                    | 96799 | 0.596                         |
| 4 knots (equidistance) | 39%                   | 99388 | 0.971                         | 19%                   | 97640        | 0.947                         | 8%                    | 96789 | 0.597                         |

Natural cubic spline model with 2 knots (equidistance) and three classes was selected.

**Table S5.** Criteria to select a best model for LDL cholesterol trajectories in the SWAN-MPS cohort (1999–2016, n = 1130, adding constant methods).

|                        | Number of Class = 2   |       |                               | Number of Class = 3   |              |                               | Number of Class = 4   |       |                               |
|------------------------|-----------------------|-------|-------------------------------|-----------------------|--------------|-------------------------------|-----------------------|-------|-------------------------------|
|                        | Smallest membership % | BIC   | Average posterior probability | Smallest membership % | BIC          | Average posterior probability | Smallest membership % | BIC   | Average posterior probability |
| Polynomial             |                       |       |                               |                       |              |                               |                       |       |                               |
| Linear                 | 36%                   | 92729 | 0.970                         | 20%                   | 90698        | 0.955                         | 7%                    | 89882 | 0.328                         |
| +quadratic             | 36%                   | 92643 | 0.971                         | 20%                   | 90587        | 0.956                         | 7%                    | 89759 | 0.651                         |
| +cubic                 | 36%                   | 90587 | 0.971                         | 20%                   | 90542        | 0.957                         | 8%                    | 89711 | 0.648                         |
| Natural cubic spline   |                       |       |                               |                       |              |                               |                       |       |                               |
| 2 knots (tertile)      | 36%                   | 92612 | 0.971                         | 20%                   | <b>90522</b> | 0.957                         | 8%                    | 89679 | 0.455                         |
| 2 knots (equidistance) | 36%                   | 92631 | 0.971                         | 20%                   | 90560        | 0.957                         | 7%                    | 89732 | 0.646                         |
| 3 knots (quartile)     | 36%                   | 92630 | 0.971                         | 20%                   | 90551        | 0.957                         | 7%                    | 89707 | 0.329                         |
| 3 knots (equidistance) | 36%                   | 92634 | 0.971                         | 20%                   | 90554        | 0.957                         | 7%                    | 89715 | 0.646                         |
| 4 knots (quintile)     | 36%                   | 92645 | 0.971                         | 20%                   | 90569        | 0.958                         | 7%                    | 89726 | 0.329                         |
| 4 knots (equidistance) | 36%                   | 92621 | 0.971                         | 20%                   | 90540        | 0.957                         | 8%                    | 89697 | 0.649                         |

Natural cubic spline model with 2 knots (tertile) and three classes was selected.

**Table S6.** Criteria to select a best model for HDL cholesterol trajectories in the SWAN-MPS cohort (1999–2016, n = 1130, adding constant methods).

|                        | Number of Class = 2   |       |                               | Number of Class = 3   |              |                               | Number of Class = 4   |       |                               |
|------------------------|-----------------------|-------|-------------------------------|-----------------------|--------------|-------------------------------|-----------------------|-------|-------------------------------|
|                        | Smallest membership % | BIC   | Average posterior probability | Smallest membership % | BIC          | Average posterior probability | Smallest membership % | BIC   | Average posterior probability |
| Polynomial             |                       |       |                               |                       |              |                               |                       |       |                               |
| Linear                 | 41%                   | 79595 | 0.976                         | 20%                   | 77128        | 0.962                         | 13%                   | 76120 | 0.588                         |
| +quadratic             | 41%                   | 79613 | 0.976                         | 20%                   | 77151        | 0.963                         | 13%                   | 76153 | 0.587                         |
| +cubic                 | 41%                   | 79614 | 0.976                         | 20%                   | 77157        | 0.963                         | 13%                   | 76161 | 0.450                         |
| Natural cubic spline   |                       |       |                               |                       |              |                               |                       |       |                               |
| 2 knots (tertile)      | 41%                   | 79590 | 0.976                         | 20%                   | 77122        | 0.963                         | 13%                   | 76118 | 0.486                         |
| 2 knots (equidistance) | 41%                   | 79626 | 0.976                         | 20%                   | 77172        | 0.963                         | 13%                   | 76181 | 0.450                         |
| 3 knots (quartile)     | 41%                   | 79595 | 0.976                         | 20%                   | 77128        | 0.963                         | 13%                   | 76132 | 0.376                         |
| 3 knots (equidistance) | 41%                   | 79619 | 0.976                         | 20%                   | 77158        | 0.963                         | 13%                   | 76173 | 0.374                         |
| 4 knots (quintile)     | 41%                   | 79592 | 0.976                         | 20%                   | 77121        | 0.964                         | 13%                   | 76132 | 0.587                         |
| 4 knots (equidistance) | 41%                   | 79544 | 0.976                         | 20%                   | <b>77063</b> | 0.963                         | 13%                   | 76050 | 0.488                         |

Natural cubic spline model with 4 knots (equidistance) and three classes was selected.



**Table S7.** Criteria to select a best model for triglycerides trajectories in the SWAN-MPS cohort (1999–2016, n = 1130, adding constant methods).

|                             | Number of Class = 2   |             |                               | Number of Class = 3   |      |                               | Number of Class = 4   |      |                               |
|-----------------------------|-----------------------|-------------|-------------------------------|-----------------------|------|-------------------------------|-----------------------|------|-------------------------------|
|                             | Smallest membership % | BIC         | Average posterior probability | Smallest membership % | BIC  | Average posterior probability | Smallest membership % | BIC  | Average posterior probability |
| <b>Polynomial</b>           |                       |             |                               |                       |      |                               |                       |      |                               |
| Linear                      | 38%                   | <b>8784</b> | 0.977                         | 10%                   | 6999 | 0.962                         | 8%                    | 6039 | 0.378                         |
| +quadratic                  | 38%                   | 8787        | 0.977                         | 10%                   | 7001 | 0.962                         | 8%                    | 6049 | 0.346                         |
| +cubic                      | 38%                   | 8790        | 0.977                         | 10%                   | 7012 | 0.962                         | 8%                    | 6064 | 0.347                         |
| <b>Natural cubic spline</b> |                       |             |                               |                       |      |                               |                       |      |                               |
| 2 knots (tertile)           | 38%                   | 8792        | 0.977                         | 10%                   | 7013 | 0.962                         | 8%                    | 6065 | 0.613                         |
| 2 knots (equidistance)      | 38%                   | 8792        | 0.977                         | 10%                   | 7014 | 0.962                         | 8%                    | 6067 | 0.424                         |
| 3 knots (quartile)          | 38%                   | 8809        | 0.977                         | 10%                   | 7039 | 0.962                         | 8%                    | 6099 | 0.509                         |
| 3 knots (equidistance)      | 38%                   | 8809        | 0.977                         | 10%                   | 7040 | 0.962                         | 8%                    | 6101 | 0.425                         |
| 4 knots (quintile)          | 38%                   | 8827        | 0.977                         | 10%                   | 7066 | 0.962                         | 8%                    | 6135 | 0.426                         |
| 4 knots (equidistance)      | 38%                   | 8826        | 0.977                         | 10%                   | 7065 | 0.962                         | 8%                    | 6133 | 0.348                         |

Linear model with two classes was selected.

**Table S8.** Classification of study participants in the SWAN-MPS cohort (1999–2016, n = 1130) by lipids trajectories from two different methods (Adding constant and covariate methods).

|                   |        | Adding constant method |        |      |                 |        |      |                 |        |      |               |      |
|-------------------|--------|------------------------|--------|------|-----------------|--------|------|-----------------|--------|------|---------------|------|
|                   |        | Total cholesterol      |        |      | LDL cholesterol |        |      | HDL cholesterol |        |      | Triglycerides |      |
|                   |        | Low                    | Middle | High | Low             | Middle | High | Low             | Middle | High | Low           | High |
| Covariate method  | Low    | 341                    | 15     | 0    | 342             | 6      | 0    | 417             | 16     | 0    | 707           | 30   |
|                   | Middle | 20                     | 535    | 8    | 26              | 530    | 20   | 10              | 446    | 7    | -             | -    |
|                   | High   | 0                      | 7      | 204  | 0               | 10     | 196  | 0               | 6      | 228  | 9             | 384  |
| Misclassification |        | 4.4%                   |        |      | 5.5%            |        |      | 3.5%            |        |      | 3.5%          |      |

**Table S9.** Associations of serum concentrations of total PFOS, PFDA, PFUnDA, MeFOSAA, and EtFOSAA with trajectories of total cholesterol, LDL cholesterol, HDL cholesterol, and triglycerides in the SWAN-MPS cohort (1999–2016, n = 1130).

| PFAS                                     | Total cholesterol |                          |                      | LDL cholesterol |                   |         | HDL cholesterol |                   |         | Triglycerides |                   |         |
|------------------------------------------|-------------------|--------------------------|----------------------|-----------------|-------------------|---------|-----------------|-------------------|---------|---------------|-------------------|---------|
|                                          | Trajectory        | OR (95% CI) <sup>a</sup> | p-value <sup>b</sup> | Trajectory      | OR (95% CI)       | p-value | Trajectory      | OR (95% CI)       | p-value | Trajectory    | OR (95% CI)       | p-value |
| Total PFOS<br>(per doubling)             | Low (n=361)       | 1.00                     |                      | Low (n=368)     | 1.00              |         | Low (n=427)     | 1.00              |         | Low (n=716)   | 1.00              |         |
|                                          | Middle (n=557)    | 1.09 (0.92, 1.28)        | 0.57                 | Middle (n=546)  | 1.16 (0.99, 1.36) | 0.15    | Middle (n=468)  | 1.02 (0.87, 1.20) | 0.96    | High (n=414)  | 0.88 (0.75, 1.02) | 0.16    |
|                                          | High (n=212)      | 1.21 (0.99, 1.49)        | 0.11                 | High (n=216)    | 1.28 (1.04, 1.56) | 0.04    | High (n=235)    | 0.97 (0.79, 1.20) | 0.95    |               |                   |         |
| PFDA<br>(detected vs.<br>non-detected)   | Low (n=361)       | 1.00                     |                      | Low (n=368)     | 1.00              |         | Low (n=427)     | 1.00              |         | Low (n=716)   | 1.00              |         |
|                                          | Middle (n=557)    | 1.37 (1.04, 1.8)         | 0.12                 | Middle (n=546)  | 1.24 (0.94, 1.63) | 0.17    | Middle (n=468)  | 1.14 (0.87, 1.51) | 0.85    | High (n=414)  | 0.70 (0.53, 0.92) | 0.10    |
|                                          | High (n=212)      | 1.56 (1.11, 2.19)        | 0.05                 | High (n=216)    | 1.53 (1.10, 2.14) | 0.04    | High (n=235)    | 1.39 (0.99, 1.96) | 0.45    |               |                   |         |
| PFUnDA<br>(detected vs.<br>non-detected) | Low (n=361)       | 1.00                     |                      | Low (n=368)     | 1.00              |         | Low (n=427)     | 1.00              |         | Low (n=717)   | 1.00              |         |
|                                          | Middle (n=557)    | 1.36 (1.02, 1.82)        | 0.12                 | Middle (n=546)  | 1.31 (0.98, 1.74) | 0.15    | Middle (n=468)  | 1.44 (1.07, 1.92) | 0.15    | High (n=415)  | 0.79 (0.58, 1.07) | 0.18    |
|                                          | High (n=212)      | 1.58 (1.13, 2.22)        | 0.05                 | High (n=216)    | 1.60 (1.15, 2.23) | 0.04    | High (n=235)    | 1.29 (0.92, 1.81) | 0.45    |               |                   |         |
| MeFOSAA<br>(per doubling)                | Low (n=361)       | 1.00                     |                      | Low (n=368)     | 1.00              |         | Low (n=427)     | 1.00              |         | Low (n=718)   | 1.00              |         |
|                                          | Middle (n=557)    | 1.04 (0.90, 1.19)        | 0.78                 | Middle (n=546)  | 1.16 (1.01, 1.34) | 0.15    | Middle (n=468)  | 1.00 (0.87, 1.16) | 0.96    | High (n=416)  | 0.98 (0.85, 1.12) | 0.75    |
|                                          | High (n=212)      | 1.15 (0.96, 1.37)        | 0.15                 | High (n=216)    | 1.15 (0.96, 1.37) | 0.17    | High (n=235)    | 1.02 (0.86, 1.22) | 0.95    |               |                   |         |
| EtFOSAA<br>(per doubling)                | Low (n=361)       | 1.00                     |                      | Low (n=368)     | 1.00              |         | Low (n=427)     | 1.00              |         | Low (n=719)   | 1.00              |         |
|                                          | Middle (n=557)    | 0.98 (0.88, 1.09)        | 0.78                 | Middle (n=546)  | 1.05 (0.94, 1.16) | 0.43    | Middle (n=468)  | 1.01 (0.89, 1.11) | 0.96    | High (n=417)  | 0.89 (0.80, 0.99) | 0.12    |
|                                          | High (n=212)      | 0.93 (0.81, 1.06)        | 0.30                 | High (n=216)    | 1.00 (0.88, 1.14) | 0.99    | High (n=235)    | 0.94 (0.82, 1.08) | 0.76    |               |                   |         |

<sup>a</sup> Odds ratios (ORs) and their 95% confidence intervals (CIs) comparing detected vs. non-detected PFDA or PFUnDA, or per doubling of MeFOSAA or EtFOSAA concentration.

<sup>b</sup> Adjusted p-value based on false discovery rate. The models were adjusted for site × race/ethnicity, age, education, menopausal status, smoking status, alcohol consumption, BMI, physical activity, and total energy intake.

**Table S10.** Associations of tertiles of serum PFAS concentrations with total cholesterol trajectories in the SWAN-MPS cohort (1999–2016, n = 1130).

| PFAS         | Trajectory class | PFAS tertile 2 vs. 1     |                      | PFAS tertile 3 vs. 1 |         |
|--------------|------------------|--------------------------|----------------------|----------------------|---------|
|              |                  | OR (95% CI) <sup>a</sup> | p-value <sup>b</sup> | OR (95% CI)          | p-value |
| n-PFOA       | Low (n=361)      | 1.00                     |                      | 1.00                 |         |
|              | Middle (n=557)   | 0.90 (0.67, 1.17)        | 0.67                 | 0.89 (0.68, 1.17)    | 0.53    |
|              | High (n=212)     | 0.73 (0.56, 0.95)        | 0.03                 | 0.90 (0.70, 1.15)    | 0.40    |
| PFNA         | Low (n=361)      | 1.00                     |                      | 1.00                 |         |
|              | Middle (n=557)   | 1.22 (0.93, 1.60)        | 0.30                 | 1.06 (0.81, 1.39)    | 0.77    |
|              | High (n=212)     | 2.21 (1.73, 2.83)        | <0.0001              | 1.18 (0.90, 1.55)    | 0.27    |
| Total PFOS   | Low (n=361)      | 1.00                     |                      | 1.00                 |         |
|              | Middle (n=557)   | 1.56 (1.19, 2.03)        | 0.009                | 1.25 (0.95, 1.64)    | 0.32    |
|              | High (n=212)     | 1.71 (1.35, 2.18)        | <0.0001              | 1.70 (1.33, 2.17)    | 0.0002  |
| n-PFOS       | Low (n=361)      | 1.00                     |                      | 1.00                 |         |
|              | Middle (n=557)   | 1.44 (1.10, 1.87)        | 0.13                 | 1.22 (0.93, 1.60)    | 0.32    |
|              | High (n=212)     | 1.61 (1.27, 2.04)        | 0.0002               | 1.61 (1.27, 2.06)    | <0.0001 |
| Sm-PFOS      | Low (n=361)      | 1.00                     |                      | 1.00                 |         |
|              | Middle (n=557)   | 1.33 (1.02, 1.73)        | 0.11                 | 1.25 (0.95, 1.65)    | 0.32    |
|              | High (n=212)     | 1.31 (1.02, 1.68)        | 0.04                 | 1.65 (1.29, 2.11)    | 0.002   |
| PFHxS        | Low (n=361)      | 1.00                     |                      | 1.00                 |         |
|              | Middle (n=557)   | 0.96 (0.73, 1.26)        | 0.77                 | 1.21 (0.92, 1.59)    | 0.32    |
|              | High (n=212)     | 1.66 (1.30, 2.12)        | 0.0001               | 1.63 (1.29, 2.05)    | 0.002   |
| MeFOSAA      | Low (n=361)      | 1.00                     |                      | 1.00                 |         |
|              | Middle (n=557)   | 0.93 (0.71, 1.21)        | 0.74                 | 0.99 (0.76, 1.29)    | 0.96    |
|              | High (n=212)     | 1.34 (1.05, 1.72)        | 0.03                 | 1.50 (1.18, 1.91)    | 0.001   |
| EtFOSAA      | Low (n=361)      | 1.00                     |                      | 1.00                 |         |
|              | Middle (n=557)   | 0.96 (0.74, 1.25)        | 0.77                 | 0.89 (0.69, 1.16)    | 0.53    |
|              | High (n=212)     | 1.02 (0.80, 1.32)        | 0.86                 | 0.76 (0.59, 0.97)    | 0.04    |
| PFAS mixture | Low (n=361)      | 1.00                     |                      | 1.00                 |         |
|              | Middle (n=557)   | 1.24 (0.95, 1.62)        | 0.26                 | 1.25 (0.93, 1.69)    | 0.32    |
|              | High (n=212)     | 1.38 (1.06, 1.80)        | 0.03                 | 1.69 (1.36, 2.12)    | 0.0003  |

<sup>a</sup> Odds ratios (ORs) and their 95% confidence intervals (CIs) for association of tertiles of PFAS concentrations (versus tertile 1) with total cholesterol trajectories (versus low trajectory). <sup>b</sup> Adjusted p-value based on false discovery rate. The models were adjusted for site × race/ethnicity, age, education, menopausal status, smoking status, alcohol consumption, BMI, physical activity, and total energy intake. Cut off points for PFAS tertile groups: 3.4 and 5.3 ng/mL for total PFOA, 0.6 and 0.8 ng/mL for PFNA, 14.2 and 21.4 ng/mL for n-PFOS, 5.7 and 9.4 ng/mL for Sm-PFOS, and 1.2 and 2.0 ng/mL for PFHxS.

**Table S11.** Associations of tertiles of serum PFAS concentrations with LDL cholesterol trajectories in the SWAN-MPS cohort (1999–2016, n = 1130).

| PFAS         | Trajectory class | PFAS tertile 2 vs. 1     |                      | PFAS tertile 3 vs. 1 |         |
|--------------|------------------|--------------------------|----------------------|----------------------|---------|
|              |                  | OR (95% CI) <sup>a</sup> | p-value <sup>b</sup> | OR (95% CI)          | p-value |
| n-PFOA       | Low (n=368)      | 1.00                     |                      | 1.00                 |         |
|              | Middle (n=546)   | 1.07 (0.82, 1.40)        | 0.69                 | 1.20 (0.91, 1.57)    | 0.33    |
|              | High (n=216)     | 0.89 (0.68, 1.15)        | 0.37                 | 1.05 (0.83, 1.35)    | 0.67    |
| PFNA         | Low (n=368)      | 1.00                     |                      | 1.00                 |         |
|              | Middle (n=546)   | 1.22 (0.93, 1.60)        | 0.33                 | 1.14 (0.87, 1.49)    | 0.45    |
|              | High (n=216)     | 1.96 (1.53, 2.51)        | <0.0001              | 1.09 (0.84, 1.43)    | 0.58    |
| Total PFOS   | Low (n=368)      | 1.00                     |                      | 1.00                 |         |
|              | Middle (n=546)   | 1.42 (1.08, 1.86)        | 0.10                 | 1.40 (1.06, 1.84)    | 0.12    |
|              | High (n=216)     | 1.97 (1.56, 2.49)        | <0.0001              | 1.94 (1.54, 2.45)    | <0.0001 |
| n-PFOS       | Low (n=368)      | 1.00                     |                      | 1.00                 |         |
|              | Middle (n=546)   | 1.25 (0.96, 1.64)        | 0.30                 | 1.31 (1.00, 1.73)    | 0.08    |
|              | High (n=216)     | 1.85 (1.47, 2.34)        | <0.0001              | 1.89 (1.50, 2.38)    | <0.0001 |
| Sm-PFOS      | Low (n=368)      | 1.00                     |                      | 1.00                 |         |
|              | Middle (n=546)   | 1.16 (0.89, 1.53)        | 0.49                 | 1.48 (1.12, 1.96)    | 0.05    |
|              | High (n=216)     | 1.56 (1.22, 2.00)        | 0.0007               | 1.92 (1.52, 2.42)    | <0.0001 |
| PFHxS        | Low (n=368)      | 1.00                     |                      | 1.00                 |         |
|              | Middle (n=546)   | 0.98 (0.74, 1.28)        | 0.85                 | 1.19 (0.90, 1.56)    | 0.33    |
|              | High (n=216)     | 1.37 (1.07, 1.74)        | 0.02                 | 1.41 (1.12, 1.78)    | 0.006   |
| MeFOSAA      | Low (n=368)      | 1.00                     |                      | 1.00                 |         |
|              | Middle (n=546)   | 1.12 (0.86, 1.46)        | 0.51                 | 1.31 (1.01, 1.70)    | 0.12    |
|              | High (n=216)     | 1.39 (1.09, 1.79)        | 0.01                 | 1.43 (1.13, 1.81)    | 0.006   |
| EtFOSAA      | Low (n=368)      | 1.00                     |                      | 1.00                 |         |
|              | Middle (n=546)   | 1.13 (0.87, 1.46)        | 0.51                 | 0.98 (0.75, 1.28)    | 0.89    |
|              | High (n=216)     | 1.30 (1.02, 1.66)        | 0.04                 | 0.91 (0.72, 1.16)    | 0.58    |
| PFAS mixture | Low (n=368)      | 1.00                     |                      | 1.00                 |         |
|              | Middle (n=546)   | 1.40 (1.06, 1.83)        | 0.16                 | 1.41 (1.04, 1.92)    | 0.52    |
|              | High (n=216)     | 1.57 (1.21, 2.03)        | 0.001                | 1.79 (1.44, 2.22)    | <0.0001 |

<sup>a</sup> Odds ratios (ORs) and their 95% confidence intervals (CIs) for association of tertiles of PFAS concentrations (versus tertile 1) with total cholesterol trajectories (versus low trajectory). <sup>b</sup> Adjusted p-value based on false discovery rate. The models were adjusted for site × race/ethnicity, age, education, menopausal status, smoking status, alcohol consumption, BMI, physical activity, and total energy intake. Cut off points for PFAS tertile groups: 3.4 and 5.3 ng/mL for total PFOA, 0.6 and 0.8 ng/mL for PFNA, 14.2 and 21.4 ng/mL for n-PFOS, 5.7 and 9.4 ng/mL for Sm-PFOS, and 1.2 and 2.0 ng/mL for PFHxS.

**Table S12.** Associations of tertiles of serum PFAS concentrations with HDL cholesterol trajectories in the SWAN-MPS cohort (1999–2016, n = 1130).

| PFAS         | Trajectory class | PFAS tertile 2 vs. 1     |                      | PFAS tertile 3 vs. 1 |         |
|--------------|------------------|--------------------------|----------------------|----------------------|---------|
|              |                  | OR (95% CI) <sup>a</sup> | p-value <sup>b</sup> | OR (95% CI)          | p-value |
| n-PFOA       | Low (n=427)      | 1.00                     |                      | 1.00                 |         |
|              | Middle (n=468)   | 0.95 (0.73, 1.24)        | 0.79                 | 0.83 (0.63, 1.10)    | 0.72    |
|              | High (n=235)     | 0.79 (0.61, 1.04)        | 0.17                 | 0.77 (0.60, 1.01)    | 0.21    |
| PFNA         | Low (n=427)      | 1.00                     |                      | 1.00                 |         |
|              | Middle (n=468)   | 0.91 (0.70, 1.19)        | 0.65                 | 0.94 (0.72, 1.23)    | 0.97    |
|              | High (n=235)     | 0.86 (0.66, 1.11)        | 0.36                 | 0.95 (0.72, 1.25)    | 0.72    |
| Total PFOS   | Low (n=427)      | 1.00                     |                      | 1.00                 |         |
|              | Middle (n=468)   | 1.16 (0.90, 1.50)        | 0.38                 | 1.01 (0.77, 1.31)    | 0.97    |
|              | High (n=235)     | 1.08 (0.84, 1.40)        | 0.54                 | 0.81 (0.62, 1.05)    | 0.23    |
| n-PFOS       | Low (n=427)      | 1.00                     |                      | 1.00                 |         |
|              | Middle (n=468)   | 1.23 (0.95, 1.59)        | 0.29                 | 0.98 (0.75, 1.27)    | 0.97    |
|              | High (n=235)     | 1.12 (0.87, 1.44)        | 0.51                 | 0.83 (0.63, 1.07)    | 0.23    |
| Sm-PFOS      | Low (n=427)      | 1.00                     |                      | 1.00                 |         |
|              | Middle (n=468)   | 0.82 (0.63, 1.06)        | 0.29                 | 0.74 (0.57, 0.96)    | 0.21    |
|              | High (n=235)     | 0.63 (0.48, 0.82)        | 0.003                | 0.57 (0.44, 0.75)    | 0.0005  |
| PFHxS        | Low (n=427)      | 1.00                     |                      | 1.00                 |         |
|              | Middle (n=468)   | 1.27 (0.97, 1.65)        | 0.29                 | 0.98 (0.75, 1.29)    | 0.97    |
|              | High (n=235)     | 1.10 (0.84, 1.42)        | 0.54                 | 1.22 (0.94, 1.58)    | 0.23    |
| MeFOSAA      | Low (n=427)      | 1.00                     |                      | 1.00                 |         |
|              | Middle (n=468)   | 1.03 (0.79, 1.34)        | 0.85                 | 0.85 (0.66, 1.11)    | 0.72    |
|              | High (n=235)     | 1.39 (1.08, 1.80)        | 0.03                 | 0.94 (0.72, 1.22)    | 0.71    |
| EtFOSAA      | Low (n=427)      | 1.00                     |                      | 1.00                 |         |
|              | Middle (n=468)   | 0.85 (0.66, 1.10)        | 0.38                 | 0.99 (0.77, 1.29)    | 0.96    |
|              | High (n=235)     | 0.62 (0.48, 0.82)        | 0.003                | 0.79 (0.61, 1.02)    | 0.21    |
| PFAS mixture | Low (n=427)      | 1.00                     |                      | 1.00                 |         |
|              | Middle (n=468)   | 1.42 (1.09, 1.86)        | 0.006                | 0.87 (0.65, 1.17)    | 0.82    |
|              | High (n=235)     | 1.26 (0.96, 1.65)        | 0.16                 | 0.85 (0.66, 1.10)    | 0.29    |

<sup>a</sup> Odds ratios (ORs) and their 95% confidence intervals (CIs) for association of tertiles of PFAS concentrations (versus tertile 1) with total cholesterol trajectories (versus low trajectory). <sup>b</sup> Adjusted p-value based on false discovery rate. The models were adjusted for site × race/ethnicity, age, education, menopausal status, smoking status, alcohol consumption, BMI, physical activity, and total energy intake. Cut off points for PFAS tertile groups: 3.4 and 5.3 ng/mL for total PFOA, 0.6 and 0.8 ng/mL for PFNA, 14.2 and 21.4 ng/mL for n-PFOS, 5.7 and 9.4 ng/mL for Sm-PFOS, and 1.2 and 2.0 ng/mL for PFHxS.

**Table S13.** Associations of tertiles of serum PFAS concentrations with triglycerides trajectories in the SWAN-MPS cohort (1999–2016, n = 1130).

| PFAS         | Trajectory class | PFAS tertile 2 vs. 1     |                      | PFAS tertile 3 vs. 1 |         |
|--------------|------------------|--------------------------|----------------------|----------------------|---------|
|              |                  | OR (95% CI) <sup>a</sup> | p-value <sup>b</sup> | OR (95% CI)          | p-value |
| n-PFOA       | Low (n=716)      | 1.00                     |                      | 1.00                 |         |
|              | High (n=414)     | 0.93 (0.67, 1.29)        | 0.88                 | 0.80 (0.56, 1.13)    | 0.36    |
| PFNA         | Low (n=716)      | 1.00                     |                      | 1.00                 |         |
|              | High (n=414)     | 1.00 (0.73, 1.38)        | 0.98                 | 0.78 (0.56, 1.08)    | 0.29    |
| Total PFOS   | Low (n=716)      | 1.00                     |                      | 1.00                 |         |
|              | High (n=414)     | 0.87 (0.63, 1.19)        | 0.84                 | 0.72 (0.52, 1.00)    | 0.22    |
| n-PFOS       | Low (n=716)      | 1.00                     |                      | 1.00                 |         |
|              | High (n=414)     | 0.86 (0.63, 1.18)        | 0.84                 | 0.71 (0.51, 0.99)    | 0.22    |
| Sm-PFOS      | Low (n=716)      | 1.00                     |                      | 1.00                 |         |
|              | High (n=414)     | 1.07 (0.77, 1.48)        | 0.88                 | 0.90 (0.64, 1.26)    | 0.56    |
| PFHxS        | Low (n=716)      | 1.00                     |                      | 1.00                 |         |
|              | High (n=414)     | 1.13 (0.82, 1.55)        | 0.84                 | 0.90 (0.65, 1.26)    | 0.56    |
| MeFOSAA      | Low (n=716)      | 1.00                     |                      | 1.00                 |         |
|              | High (n=414)     | 1.03 (0.74, 1.41)        | 0.98                 | 0.86 (0.62, 1.19)    | 0.54    |
| EtFOSAA      | Low (n=716)      | 1.00                     |                      | 1.00                 |         |
|              | High (n=414)     | 1.19 (0.87, 1.63)        | 0.84                 | 0.73 (0.52, 1.03)    | 0.22    |
| PFAS Mixture | Low (n=716)      | 1.00                     |                      | 1.00                 |         |
|              | High (n=414)     | 0.79 (0.58, 1.09)        | 0.84                 | 0.86 (0.59, 1.26)    | 0.56    |

<sup>a</sup> Odds ratios (ORs) and their 95% confidence intervals (CIs) for association of tertiles of PFAS concentrations (versus tertile 1) with total cholesterol trajectories (versus low trajectory). <sup>b</sup>

Adjusted p-value based on false discovery rate. The models were adjusted for site × race/ethnicity, age, education, menopausal status, smoking status, alcohol consumption, BMI, physical activity, and total energy intake. Cut off points for PFAS tertile groups: 3.4 and 5.3 ng/mL for total PFOA, 0.6 and 0.8 ng/mL for PFNA, 14.2 and 21.4 ng/mL for n-PFOS, 5.7 and 9.4 ng/mL for Sm-PFOS, and 1.2 and 2.0 ng/mL for PFHxS.

**Table S14.** Associations of serum PFAS concentrations with trajectories of total cholesterol, LDL cholesterol, HDL cholesterol, and triglycerides when the models were not adjusted for BMI in the SWAN-MPS cohort (1999–2016, n = 1130).

| PFAS       | Total cholesterol |                          |                      | LDL cholesterol |                   |         | HDL cholesterol |                   |         | Triglycerides |                   |         |
|------------|-------------------|--------------------------|----------------------|-----------------|-------------------|---------|-----------------|-------------------|---------|---------------|-------------------|---------|
|            | Trajectory        | OR (95% CI) <sup>a</sup> | p-value <sup>b</sup> | Trajectory      | OR (95% CI)       | p-value | Trajectory      | OR (95% CI)       | p-value | Trajectory    | OR (95% CI)       | p-value |
| n-PFOA     | Low (n=361)       | 1.00                     |                      | Low (n=368)     | 1.00              |         | Low (n=427)     | 1.00              |         | Low (n=716)   | 1.00              |         |
|            | Middle (n=557)    | 0.99 (0.84, 1.17)        | 0.83                 | Middle (n=546)  | 0.99 (0.84, 1.17) | 0.83    | Middle (n=468)  | 0.94 (0.80, 1.11) | 0.34    | High (n=414)  | 0.94 (0.80, 1.10) | 0.71    |
|            | High (n=212)      | 0.95 (0.77, 1.16)        | 0.43                 | High (n=216)    | 0.95 (0.77, 1.16) | 0.98    | High (n=235)    | 0.85 (0.69, 1.04) | 0.06    | -             | -                 |         |
| PFNA       | Low (n=361)       | 1.00                     |                      | Low (n=368)     | 1.00              |         | Low (n=427)     | 1.00              |         | Low (n=716)   | 1.00              |         |
|            | Middle (n=557)    | 1.07 (0.91, 1.25)        | 0.41                 | Middle (n=546)  | 1.10 (0.94, 1.29) | 0.22    | Middle (n=468)  | 1.13 (0.96, 1.33) | 0.13    | High (n=414)  | 0.84 (0.73, 0.98) | 0.03    |
|            | High (n=212)      | 1.21 (0.98, 1.49)        | 0.08                 | High (n=216)    | 1.18 (0.96, 1.44) | 0.11    | High (n=235)    | 1.09 (0.89, 1.34) | 0.39    | -             | -                 |         |
| Total PFOS | Low (n=361)       | 1.00                     |                      | Low (n=368)     | 1.00              |         | Low (n=427)     | 1.00              |         | Low (n=716)   | 1.00              |         |
|            | Middle (n=557)    | 1.08 (0.93, 1.27)        | 0.31                 | Middle (n=546)  | 1.16 (0.99, 1.36) | 0.06    | Middle (n=468)  | 0.97 (0.83, 1.14) | 0.72    | High (n=414)  | 0.95 (0.82, 1.10) | 0.50    |
|            | High (n=212)      | 1.19 (0.98, 1.45)        | 0.08                 | High (n=216)    | 1.28 (1.05, 1.55) | 0.01    | High (n=235)    | 0.83 (0.68, 1.02) | 0.07    | -             | -                 |         |
| n-PFOS     | Low (n=361)       | 1.00                     |                      | Low (n=368)     | 1.00              |         | Low (n=427)     | 1.00              |         | Low (n=716)   | 1.00              |         |
|            | Middle (n=557)    | 1.08 (0.92, 1.27)        | 0.33                 | Middle (n=546)  | 1.14 (0.97, 1.34) | 0.10    | Middle (n=468)  | 1.00 (0.85, 1.17) | 0.99    | High (n=414)  | 0.92 (0.80, 1.07) | 0.29    |
|            | High (n=212)      | 1.20 (0.98, 1.46)        | 0.08                 | High (n=216)    | 1.28 (1.05, 1.56) | 0.01    | High (n=235)    | 0.87 (0.71, 1.07) | 0.18    | -             | -                 |         |
| Sm-PFOS    | Low (n=361)       | 1.00                     |                      | Low (n=368)     | 1.00              |         | Low (n=427)     | 1.00              |         | Low (n=716)   | 1.00              |         |
|            | Middle (n=557)    | 1.10 (0.96, 1.25)        | 0.18                 | Middle (n=546)  | 1.19 (1.04, 1.36) | 0.01    | Middle (n=468)  | 0.91 (0.79, 1.04) | 0.16    | High (n=414)  | 1.05 (0.92, 1.19) | 0.48    |
|            | High (n=212)      | 1.17 (0.99, 1.40)        | 0.07                 | High (n=216)    | 1.25 (1.05, 1.49) | 0.01    | High (n=235)    | 0.81 (0.68, 0.96) | 0.02    | -             | -                 |         |
| PFHxS      | Low (n=361)       | 1.00                     |                      | Low (n=368)     | 1.00              |         | Low (n=427)     | 1.00              |         | Low (n=716)   | 1.00              |         |
|            | Middle (n=557)    | 1.16 (1.03, 1.30)        | 0.02                 | Middle (n=546)  | 1.12 (0.99, 1.26) | 0.06    | Middle (n=468)  | 1.06 (0.94, 1.20) | 0.32    | High (n=414)  | 0.98 (0.88, 1.10) | 0.73    |
|            | High (n=212)      | 1.17 (1.00, 1.36)        | 0.05                 | High (n=216)    | 1.11 (0.96, 1.29) | 0.16    | High (n=235)    | 1.12 (0.96, 1.30) | 0.15    | -             | -                 |         |

<sup>a</sup> Odds ratios (ORs) and their 95% confidence intervals (CIs) per doubling of each PFAS concentration. <sup>b</sup> Adjusted p-value based on false discovery rate. The models were adjusted for site × race/ethnicity, age, education, menopausal status, smoking status, alcohol consumption, physical activity, and total energy intake.



**Table S15.** Cross-sectional association of serum PFAS concentrations (ng/mL) with blood lipid levels at baseline (mg/dL) in the SWAN-MPS cohort (1999–2016, n = 1130).

|         | Total cholesterol                 |                      | LDL cholesterol      |         | HDL cholesterol      |         | log(triglycerides)   |         |
|---------|-----------------------------------|----------------------|----------------------|---------|----------------------|---------|----------------------|---------|
|         | Effect size (95% CI) <sup>a</sup> | p-value <sup>b</sup> | Effect size (95% CI) | p-value | Effect size (95% CI) | p-value | Effect size (95% CI) | p-value |
| n-PFOA  | -1.48 (-4.16, 1.20)               | 0.38                 | -0.45 (-2.87, 1.96)  | 0.71    | 0.35 (-0.70, 1.40)   | 0.52    | -0.04 (-0.08, -0.01) | 0.03    |
| PFNA    | 0.85 (-1.62, 3.31)                | 0.50                 | 1.38 (-0.84, 3.60)   | 0.28    | 0.43 (-0.54, 1.39)   | 0.48    | -0.04 (-0.07, -0.01) | 0.04    |
| n-PFOS  | 1.37 (-1.20, 3.94)                | 0.38                 | 1.85 (-0.46, 4.17)   | 0.28    | 0.73 (-0.28, 1.74)   | 0.40    | -0.04 (-0.08, -0.01) | 0.03    |
| Sm-PFOS | 2.36 (0.20, 4.52)                 | 0.16                 | 2.47 (0.53, 4.42)    | 0.06    | 0.43 (-0.42, 1.28)   | 0.48    | -0.02 (-0.04, 0.01)  | 0.21    |
| PFHxS   | 0.98 (-0.90, 2.85)                | 0.38                 | 1.11 (-0.58, 2.80)   | 0.28    | 0.53 (-0.21, 1.26)   | 0.40    | -0.02 (-0.04, 0.01)  | 0.17    |

<sup>a</sup> Increases in lipid levels and their 95% confidence intervals (CIs) per doubling of each PFAS concentration. <sup>b</sup> Adjusted p-value based on false discovery rate. The models were adjusted for site × race/ethnicity, age, education, menopausal status, smoking status, alcohol consumption, BMI, physical activity, and total energy intake.

**Table S16.** Association of serum PFAS concentrations (ng/mL) with rate of change in blood lipid levels during follow-up (mg/dL/year) in the SWAN-MPS cohort (1999–2016, n = 1130).

|                                                                                                    | Total cholesterol                    |                      | LDL cholesterol         |         | HDL cholesterol         |         | Triglycerides           |         |
|----------------------------------------------------------------------------------------------------|--------------------------------------|----------------------|-------------------------|---------|-------------------------|---------|-------------------------|---------|
|                                                                                                    | Effect size<br>(95% CI) <sup>a</sup> | p-value <sup>b</sup> | Effect size<br>(95% CI) | p-value | Effect size<br>(95% CI) | p-value | Effect size<br>(95% CI) | p-value |
| <b>Rate of lipid change from baseline to Visit 6 (on average 3.01 years of follow-up, n=1095)</b>  |                                      |                      |                         |         |                         |         |                         |         |
| n-PFOA                                                                                             | 0.43 (-0.26, 1.11)                   | 0.55                 | 0.28 (-0.33, 0.90)      | 0.76    | -0.12 (-0.36, 0.12)     | 0.52    | 1.35 (0.14, 2.57)       | 0.15    |
| PFNA                                                                                               | 0.14 (-0.49, 0.77)                   | 0.74                 | 0.12 (-0.44, 0.69)      | 0.76    | -0.01 (-0.23, 0.21)     | 0.92    | 0.19 (-0.93, 1.32)      | 0.74    |
| n-PFOS                                                                                             | -0.31 (-0.96, 0.35)                  | 0.60                 | -0.21 (-0.80, 0.38)     | 0.76    | -0.31 (-0.54, -0.08)    | 0.04    | 1.08 (-0.09, 2.26)      | 0.18    |
| Sm-PFOS                                                                                            | -0.38 (-0.93, 0.17)                  | 0.55                 | -0.03 (-0.79, 0.19)     | 0.76    | -0.15 (-0.34, 0.04)     | 0.33    | 0.34 (-0.64, 1.32)      | 0.62    |
| PFHxS                                                                                              | 0.08 (-0.40, 0.56)                   | 0.74                 | 0.07 (-0.36, 0.50)      | 0.76    | -0.05 (-0.22, 0.12)     | 0.72    | 0.31 (-0.54, 1.17)      | 0.62    |
| <b>Rate of lipid change from baseline to Visit 9 (on average 5.98 years of follow-up, n=1026)</b>  |                                      |                      |                         |         |                         |         |                         |         |
| n-PFOA                                                                                             | 0.19 (-0.22, 0.59)                   | 0.95                 | 0.06 (-0.27, 0.38)      | 0.85    | 0.00 (-0.14, 0.15)      | 0.98    | 0.51 (-0.18, 1.20)      | 0.34    |
| PFNA                                                                                               | -0.01 (-0.38, 0.35)                  | 0.95                 | -0.10 (-0.39, 0.19)     | 0.85    | 0.03 (-0.10, 0.16)      | 0.98    | 0.18 (-0.45, 0.80)      | 0.72    |
| n-PFOS                                                                                             | 0.03 (-0.35, 0.40)                   | 0.95                 | -0.07 (-0.38, 0.23)     | 0.85    | -0.07 (-0.20, 0.07)     | 0.98    | 0.53 (-0.12, 1.17)      | 0.34    |
| Sm-PFOS                                                                                            | 0.04 (-0.28, 0.37)                   | 0.95                 | -0.03 (-0.30, 0.23)     | 0.85    | -0.05 (-0.17, 0.07)     | 0.98    | 0.36 (-0.20, 0.92)      | 0.34    |
| PFHxS                                                                                              | 0.01 (-0.26, 0.29)                   | 0.95                 | -0.02 (-0.25, 0.20)     | 0.85    | 0.01 (-0.09, 0.11)      | 0.98    | 0.02 (-0.46, 0.50)      | 0.93    |
| <b>Rate of lipid change from baseline to Visit 12 (on average 10.69 years of follow-up, n=956)</b> |                                      |                      |                         |         |                         |         |                         |         |
| n-PFOA                                                                                             | -0.10 (-0.35, 0.14)                  | 0.50                 | -0.11 (-0.31, 0.08)     | 0.53    | -0.02 (-0.11, 0.07)     | 0.83    | 0.32 (-0.90, 0.73)      | 0.15    |
| PFNA                                                                                               | 0.10 (-0.12, 0.32)                   | 0.50                 | 0.00 (-0.17, 0.17)      | 0.93    | 0.02 (-0.06, 0.10)      | 0.83    | 0.41 (0.05, 0.78)       | 0.06    |
| n-PFOS                                                                                             | -0.03 (-0.27, 0.20)                  | 0.79                 | -0.09 (-0.28, 0.09)     | 0.53    | -0.04 (-0.13, 0.05)     | 0.83    | 0.51 (0.13, 0.90)       | 0.05    |
| Sm-PFOS                                                                                            | -0.10 (-0.29, 0.10)                  | 0.50                 | -0.11 (-0.26, 0.05)     | 0.53    | -0.04 (-0.12, 0.03)     | 0.83    | 0.26 (-0.06, 0.59)      | 0.15    |
| PFHxS                                                                                              | 0.09 (-0.08, 0.26)                   | 0.50                 | 0.03 (-0.11, 0.16)      | 0.83    | 0.01 (-0.06, 0.07)      | 0.83    | 0.21 (-0.08, 0.49)      | 0.15    |

<sup>a</sup> Increases in rate of change in lipid levels and their 95% confidence intervals (CIs) per doubling of each PFAS concentration. <sup>b</sup> Adjusted p-value based on false discovery rate. The models were adjusted for site × race/ethnicity, age, education, menopausal status, smoking status, alcohol consumption, BMI, physical activity, and total energy intake.

## **Method for literature review of studies on the association of PFAS exposure with lipids**

We conducted a search of research articles in PubMed database up until June 2022 using relevant keywords. We limited the studies that measured blood concentrations of total cholesterol, LDL cholesterol, HDL cholesterol, and/or triglycerides as outcomes. Given a plenty of cross-sectional studies published on this topic, we only included those that involved a sample size greater than 500 or those that included a population with high exposure (e.g., occupational exposure). All available longitudinal studies were included regardless of their sample sizes.

**Table S17** Summary of results of selected epidemiological studies<sup>a</sup> on associations between PFAS and lipids.

| Reference, study population, and note                       | Lipid             | Result                                                                                 |
|-------------------------------------------------------------|-------------------|----------------------------------------------------------------------------------------|
| <i>Cross-sectional study, general population</i>            |                   |                                                                                        |
| <b>Château-Degat et al. 2010</b><br>Canadian Inuit (n=723)  | Total cholesterol | PFOS: <b>positive</b> association                                                      |
|                                                             | LDL cholesterol   | PFOS: null association                                                                 |
|                                                             | HDL cholesterol   | PFOS: <b>positive</b> association                                                      |
|                                                             | Triglycerides     | PFOS: null association                                                                 |
| <b>Eriksen et al. 2013</b><br>Danish midlife adults (n=753) | Total cholesterol | PFOA: <b>positive</b> association<br>PFOS: <b>positive</b> association                 |
|                                                             |                   |                                                                                        |
| <b>Fisher et al. 2013</b><br>Canadian adults (n=3496)       | Total cholesterol | PFOA: null association<br>PFOS: null association<br>PFHxS: <b>positive</b> association |
|                                                             | LDL cholesterol   | PFOA: null association<br>PFOS: null association<br>PFHxS: <b>positive</b> association |
|                                                             | HDL cholesterol   | PFOA: null association<br>PFOS: null association<br>PFHxS: null association            |
|                                                             | Triglycerides     | PFOA: null association<br>PFOS: null association<br>PFHxS: null association            |
| <b>Liu et al. 2018</b><br>US adults (NHANES, n=1871)        | Total cholesterol | PFOA: <b>positive</b> association<br>PFOS: null association                            |
|                                                             | LDL cholesterol   | PFOA: null association<br>PFOS: null association                                       |
|                                                             | HDL cholesterol   | PFOA: <b>positive</b> association<br>PFOS: <b>positive</b> association                 |
|                                                             | Triglycerides     | PFOA: <b>inverse</b> association<br>PFOS: <b>inverse</b> association                   |
| <b>Cong et al. 2021</b><br>Chinese older adults (n=1238)    | Total cholesterol | PFOA: <b>positive</b> association<br>PFOS: <b>positive</b> association                 |
|                                                             | LDL cholesterol   | PFOA: <b>positive</b> association<br>PFOS: <b>positive</b> association                 |
|                                                             | HDL cholesterol   | PFOA: null association<br>PFOS: null association                                       |
|                                                             | Triglycerides     | PFOA: null association<br>PFOS: null association                                       |

**Table S17** (Continued)

| Reference, study population, and note                                                                                  | Lipid             | Result                                                                                  |
|------------------------------------------------------------------------------------------------------------------------|-------------------|-----------------------------------------------------------------------------------------|
| <i>Cross-sectional study, population with high exposure</i>                                                            |                   |                                                                                         |
| <b>Steenland et al. 2009</b><br>US adults with high exposure to PFOA via contaminated drinking water (n=46294)         | Total cholesterol | PFOA: positive association<br>PFOS: positive association                                |
|                                                                                                                        | LDL cholesterol   | PFOA: positive association<br>PFOS: positive association                                |
|                                                                                                                        | HDL cholesterol   | PFOA: null association<br>PFOS: null association                                        |
|                                                                                                                        | Triglycerides     | PFOA: positive association<br>PFOS: positive association                                |
| <b>Wang et al. 2012</b><br>Chinese residents living near fluorochemical plants (n=132)                                 | Total cholesterol | PFOA: null association                                                                  |
|                                                                                                                        | LDL cholesterol   | PFOA: null association                                                                  |
|                                                                                                                        | HDL cholesterol   | PFOA: null association                                                                  |
|                                                                                                                        | Triglycerides     | PFOA: null association                                                                  |
| <b>Canova et al. 2020</b><br>Italian young adults with high exposure to PFAS via contaminated drinking water (n=15720) | Total cholesterol | PFOA: positive association<br>PFOS: positive association<br>PFHxS: positive association |
|                                                                                                                        | LDL cholesterol   | PFOA: positive association<br>PFOS: positive association<br>PFHxS: positive association |
|                                                                                                                        | HDL cholesterol   | PFOA: positive association<br>PFOS: positive association<br>PFHxS: positive association |
|                                                                                                                        | Triglycerides     | PFOA: positive association<br>PFOS: null association<br>PFHxS: positive association     |
| <b>Li et al. 2020</b><br>Swedish adults with recent exposure to PFAS via contaminated drinking water (n=1160)          | Total cholesterol | PFOA: positive association<br>PFOS: positive association<br>PFHxS: positive association |
|                                                                                                                        | LDL cholesterol   | PFOA: positive association<br>PFOS: positive association<br>PFHxS: positive association |
|                                                                                                                        | HDL cholesterol   | PFOA: positive association<br>PFOS: positive association<br>PFHxS: positive association |
|                                                                                                                        | Triglycerides     | PFOA: null association<br>PFOS: inverse association<br>PFHxS: null association          |

**Table S17 (Continued)**

| Reference, study population, and note                                                                                                                                                                                                                  | Lipid                | Result                                                                                                                                                                  |
|--------------------------------------------------------------------------------------------------------------------------------------------------------------------------------------------------------------------------------------------------------|----------------------|-------------------------------------------------------------------------------------------------------------------------------------------------------------------------|
| <i>Cross-sectional study, occupational population</i>                                                                                                                                                                                                  |                      |                                                                                                                                                                         |
| <b>Wang et al. 2012</b><br>Workers exposed to PFAS (n=55)                                                                                                                                                                                              | Total cholesterol    | PFOA: null association                                                                                                                                                  |
|                                                                                                                                                                                                                                                        | LDL cholesterol      | PFOA: null association                                                                                                                                                  |
|                                                                                                                                                                                                                                                        | HDL cholesterol      | PFOA: <b>inverse</b> association                                                                                                                                        |
|                                                                                                                                                                                                                                                        | Triglycerides        | PFOA: null association                                                                                                                                                  |
| <i>Longitudinal study, general population</i>                                                                                                                                                                                                          |                      |                                                                                                                                                                         |
| <b>Donat-Vargas et al. 2019</b><br>Swedish adults (n=187)<br><i>* PFAS and lipids were measured at baseline and follow-up (10-year interval). The average PFAS concentrations were associated with lipids at follow-up.</i>                            | Total cholesterol    | PFOA: null association<br>PFNA: null association<br>PFOS: null association<br>PFHxS: null association                                                                   |
|                                                                                                                                                                                                                                                        | Triglycerides        | PFOA: null association<br>PFNA: <b>inverse</b> association<br>PFOS: <b>inverse</b> association<br>PFHxS: null association                                               |
| <b>Lin et al. 2019</b><br>US adults with overweight or prediabetic symptoms (n=888)<br><i>* A randomized controlled trial was conducted with two groups (lifestyle intervention and placebo), and the participants were followed-up for ~15 years.</i> | Hypercholesterolemia | PFOA: null association<br>PFNA: <b>positive</b> association only in placebo group<br>PFOS: null association<br>PFHxS: null association                                  |
|                                                                                                                                                                                                                                                        | Hypertriglyceridemia | PFOA: <b>positive</b> association<br>PFNA: <b>positive</b> association<br>PFOS: <b>positive</b> association only in placebo group<br>PFHxS: <b>positive</b> association |

**Table S17 (Continued)**

| Reference, study population, and note                                                                                                                                                                                                                                   | Lipid                | Result                                                                                                                                                                                |
|-------------------------------------------------------------------------------------------------------------------------------------------------------------------------------------------------------------------------------------------------------------------------|----------------------|---------------------------------------------------------------------------------------------------------------------------------------------------------------------------------------|
| <p><b>Dunder et al. 2022</b><br/>                     Swedish older adults (n=864)<br/>                     * <i>Changes in PFAS concentrations over 10 years were associated with changes in lipids over 10 years.</i></p>                                             | Total cholesterol    | PFOA: <a href="#">positive</a> association<br>PFNA: <a href="#">positive</a> association<br>PFOS: null association<br>PFHxS: <a href="#">positive</a> association                     |
|                                                                                                                                                                                                                                                                         | LDL cholesterol      | PFOA: null association<br>PFNA: null association<br>PFOS: null association<br>PFHxS: null association                                                                                 |
|                                                                                                                                                                                                                                                                         | HDL cholesterol      | PFOA: <a href="#">positive</a> association<br>PFNA: <a href="#">positive</a> association<br>PFOS: <a href="#">positive</a> association<br>PFHxS: <a href="#">positive</a> association |
|                                                                                                                                                                                                                                                                         | Triglycerides        | PFOA: <a href="#">positive</a> association<br>PFNA: <a href="#">positive</a> association<br>PFOS: null association<br>PFHxS: <a href="#">positive</a> association                     |
| <i>Longitudinal study, population with high exposure</i>                                                                                                                                                                                                                |                      |                                                                                                                                                                                       |
| <p><b>Fitz-Simon et al. 2013</b><br/>                     US adults with high exposure to PFOA via contaminated drinking water (n=560)<br/>                     * <i>Changes in PFAS concentrations over 4 years were associated with changes in lipids levels.</i></p> | Total cholesterol    | PFOA: <a href="#">positive</a> association<br>PFOS: <a href="#">positive</a> association                                                                                              |
|                                                                                                                                                                                                                                                                         | LDL cholesterol      | PFOA: <a href="#">positive</a> association<br>PFOS: <a href="#">positive</a> association                                                                                              |
|                                                                                                                                                                                                                                                                         | HDL cholesterol      | PFOA: null association<br>PFOS: null association                                                                                                                                      |
|                                                                                                                                                                                                                                                                         | Triglycerides        | PFOA: null association<br>PFOS: null association                                                                                                                                      |
| <p><b>Winqvist and Steenland 2015</b><br/>                     US adults with high exposure to PFOA via contaminated drinking water (n=28541)</p>                                                                                                                       | Hypercholesterolemia | PFOA: <a href="#">positive</a> association                                                                                                                                            |
| <i>Longitudinal study, occupational population</i>                                                                                                                                                                                                                      |                      |                                                                                                                                                                                       |
| <p><b>Olsen et al. 2003</b><br/>                     Workers exposed to PFAS (n=174)<br/>                     * <i>Mixed effect models with repeated measures were used.</i></p>                                                                                        | Total cholesterol    | PFOA: <a href="#">positive</a> association<br>PFOS: null association                                                                                                                  |
|                                                                                                                                                                                                                                                                         | Triglycerides        | PFOA: <a href="#">positive</a> association<br>PFOS: null association                                                                                                                  |

**Table S17** (Continued)

| <b>Reference, study population, and note</b>                                                                                               | <b>Lipid</b>      | <b>Result</b>                              |
|--------------------------------------------------------------------------------------------------------------------------------------------|-------------------|--------------------------------------------|
| <b>Sakr et al. 2007</b><br>Workers exposed to PFOA (n=454)<br><i>* Mixed effect models with repeated measures were used.</i>               | Total cholesterol | PFOA: <a href="#">positive</a> association |
|                                                                                                                                            | LDL cholesterol   | PFOA: null association                     |
|                                                                                                                                            | HDL cholesterol   | PFOA: null association                     |
|                                                                                                                                            | Triglycerides     | PFOA: null association                     |
| <sup>a</sup> Comprehensive review on this issue can be found in previous literature (Andersen et al. 2021; ATSDR 2021; Fragki et al. 2021) |                   |                                            |



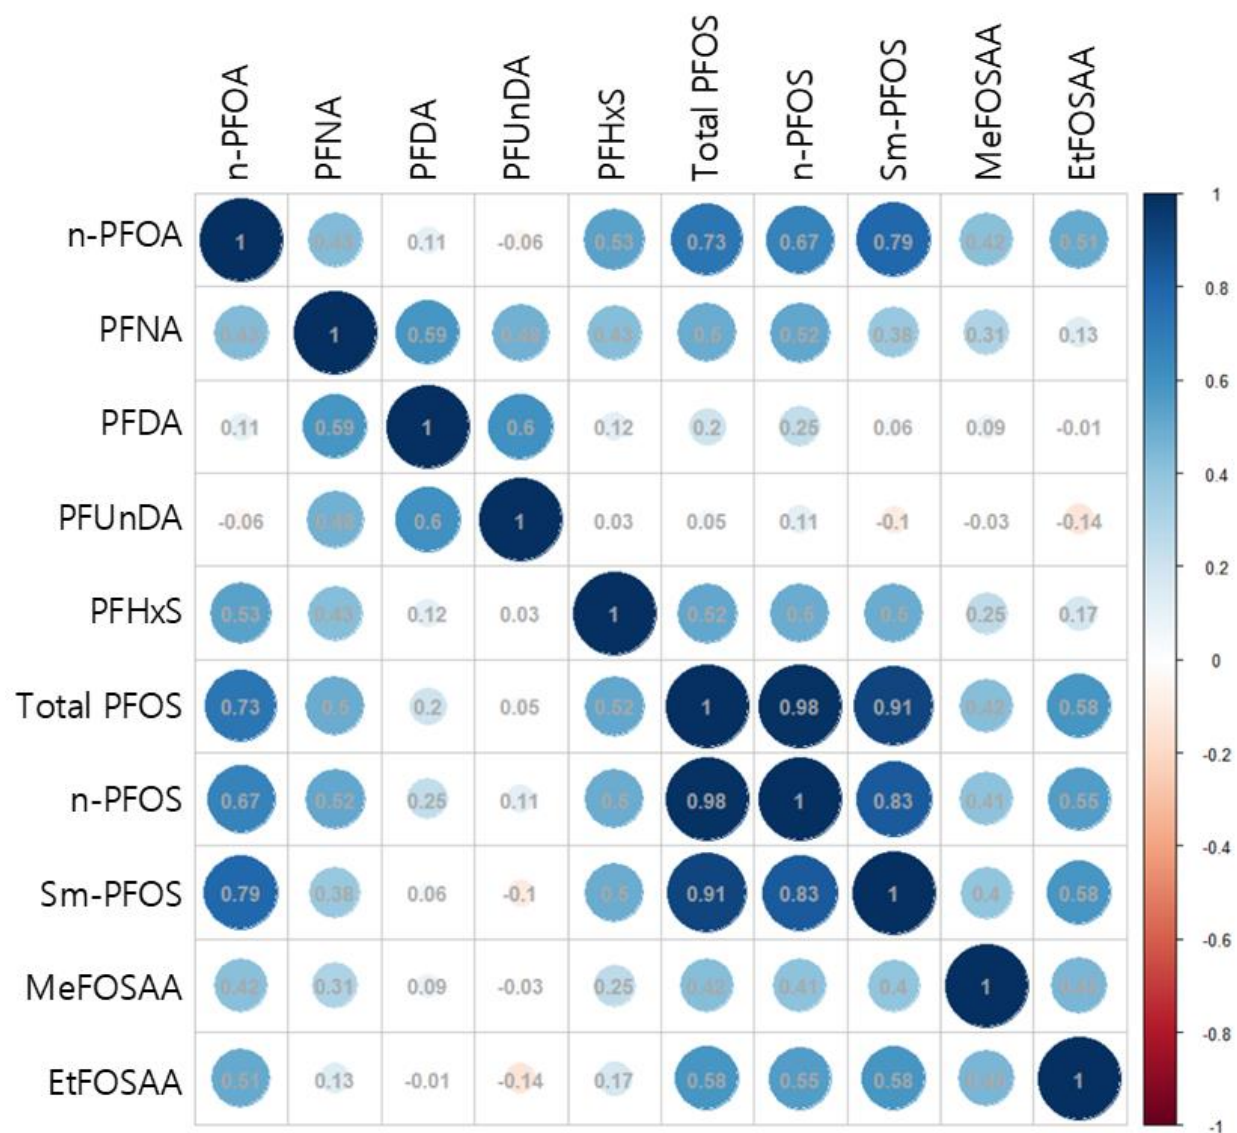

**Figure S1.** Spearman's correlations between serum PFAS concentrations in the SWAN-MPS cohort (1999–2016, n = 1130).

**(A) Total cholesterol**

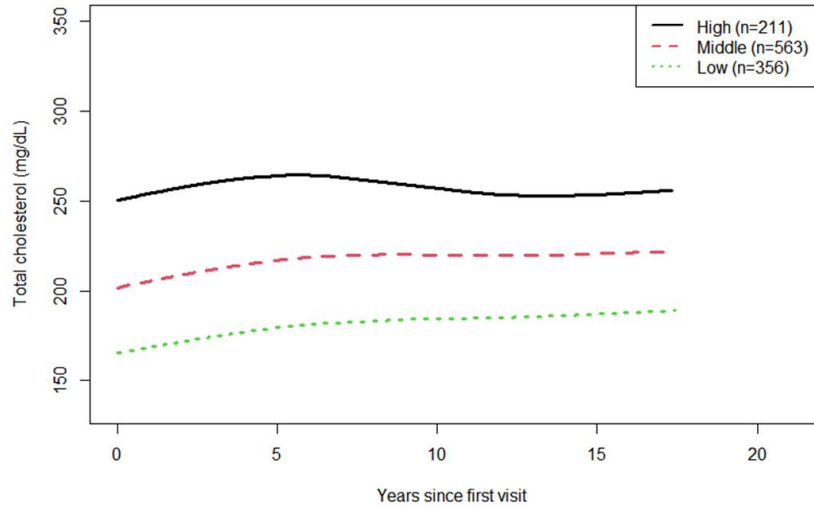

**(B) LDL cholesterol**

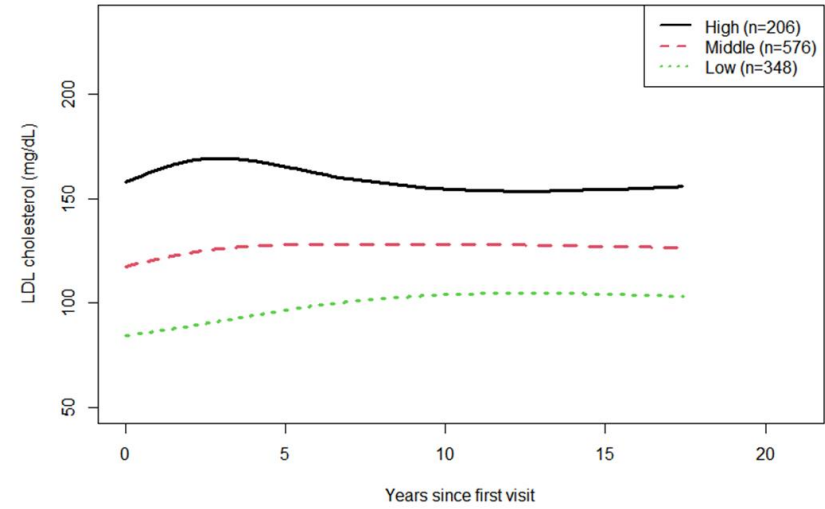

**(C) HDL cholesterol**

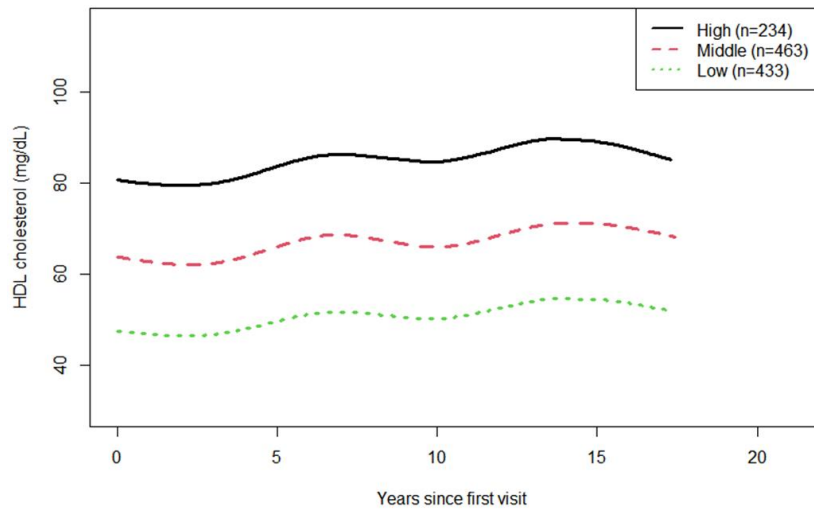

**(D) Triglycerides**

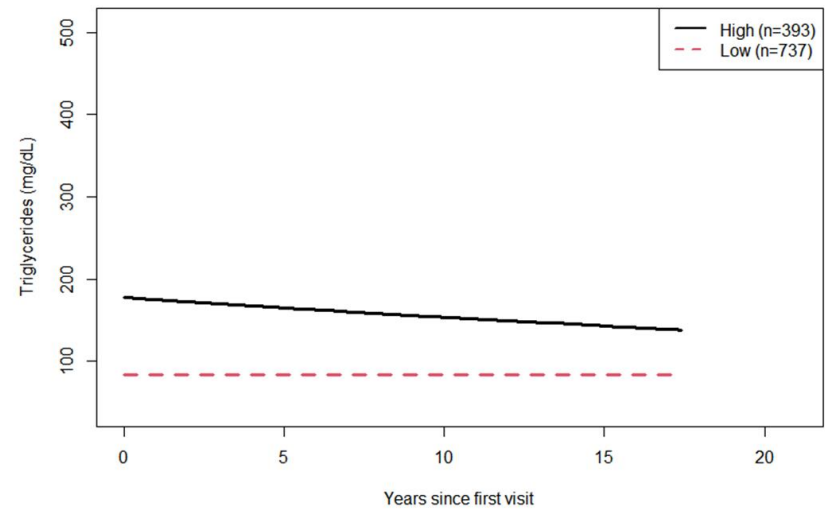

**Figure S2.** Trajectories of (A) total cholesterol, (B) LDL cholesterol, (C) HDL cholesterol, and (D) triglycerides identified by latent class growth model in the SWAN-MPS cohort (1999–2016, n = 1130). ‘Covariate method’ (described in the Methods of the main text) was applied to consider lipid-lowering medication effects.

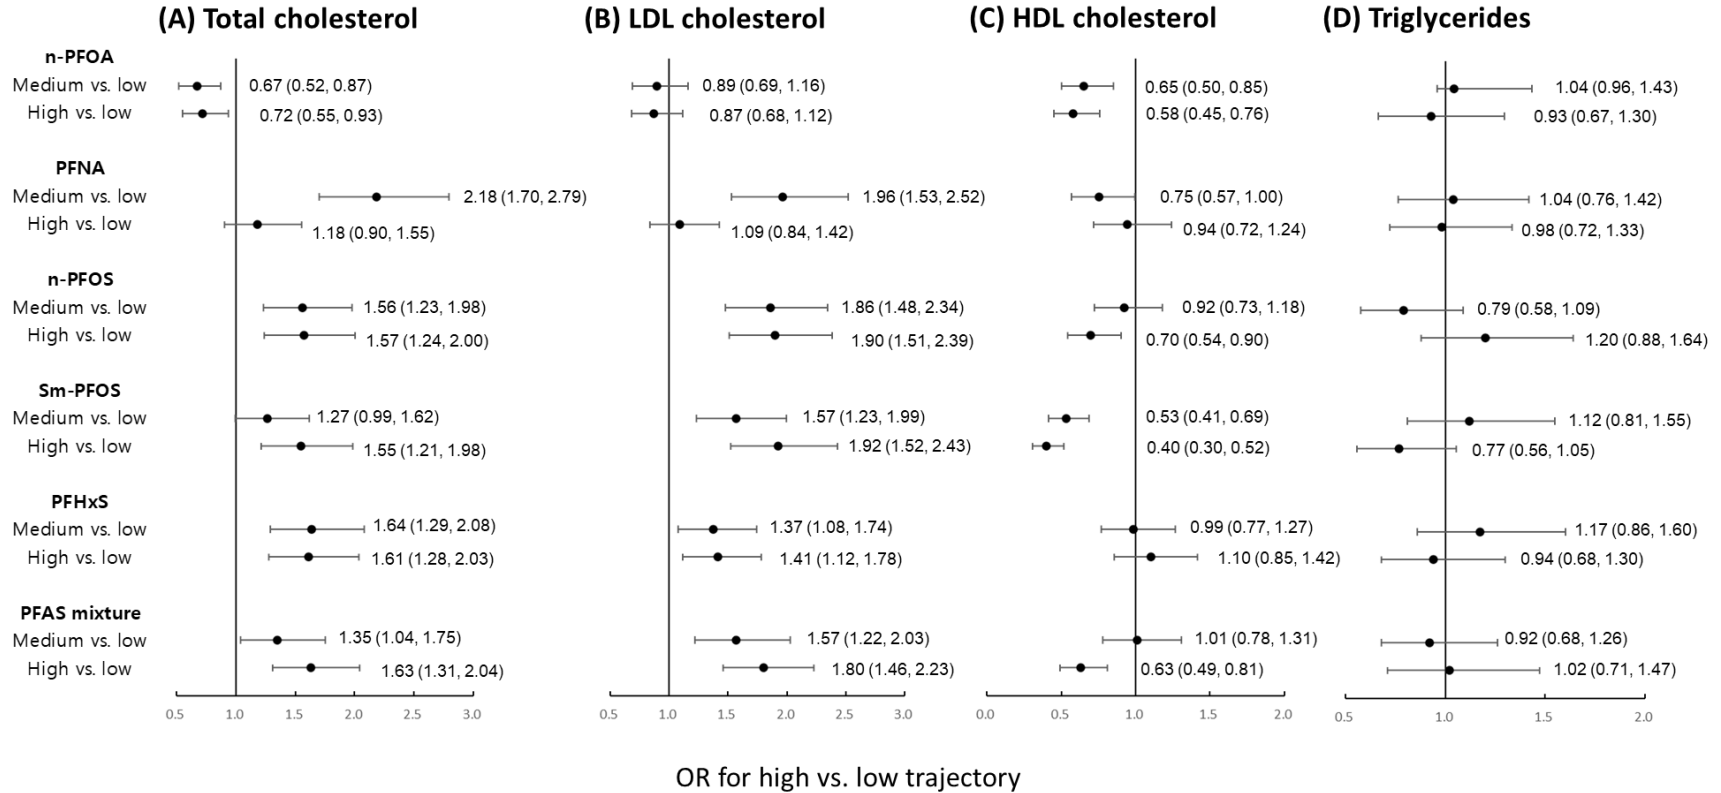

**Figure S3.** Odds ratios (●) and their 95% confidence intervals (bar) for associations of tertiles of PFAS concentrations (versus tertile 1) or PFAS mixture (versus low concentration) with trajectories (high versus low trajectories) of (A) total cholesterol, (B) LDL cholesterol, (C) HDL cholesterol, and (D) triglycerides when the models were not adjusted for BMI in the SWAN-MPS cohort (1999–2016, n = 1130). The models were adjusted for site × race/ethnicity, age, education, menopausal status, smoking status, alcohol consumption, physical activity, and total energy intake. The numbers at the right side of the bars represent odds ratios and their 95% confidence intervals. Results with continuous PFAS concentrations can be found in supplemental Table S14.

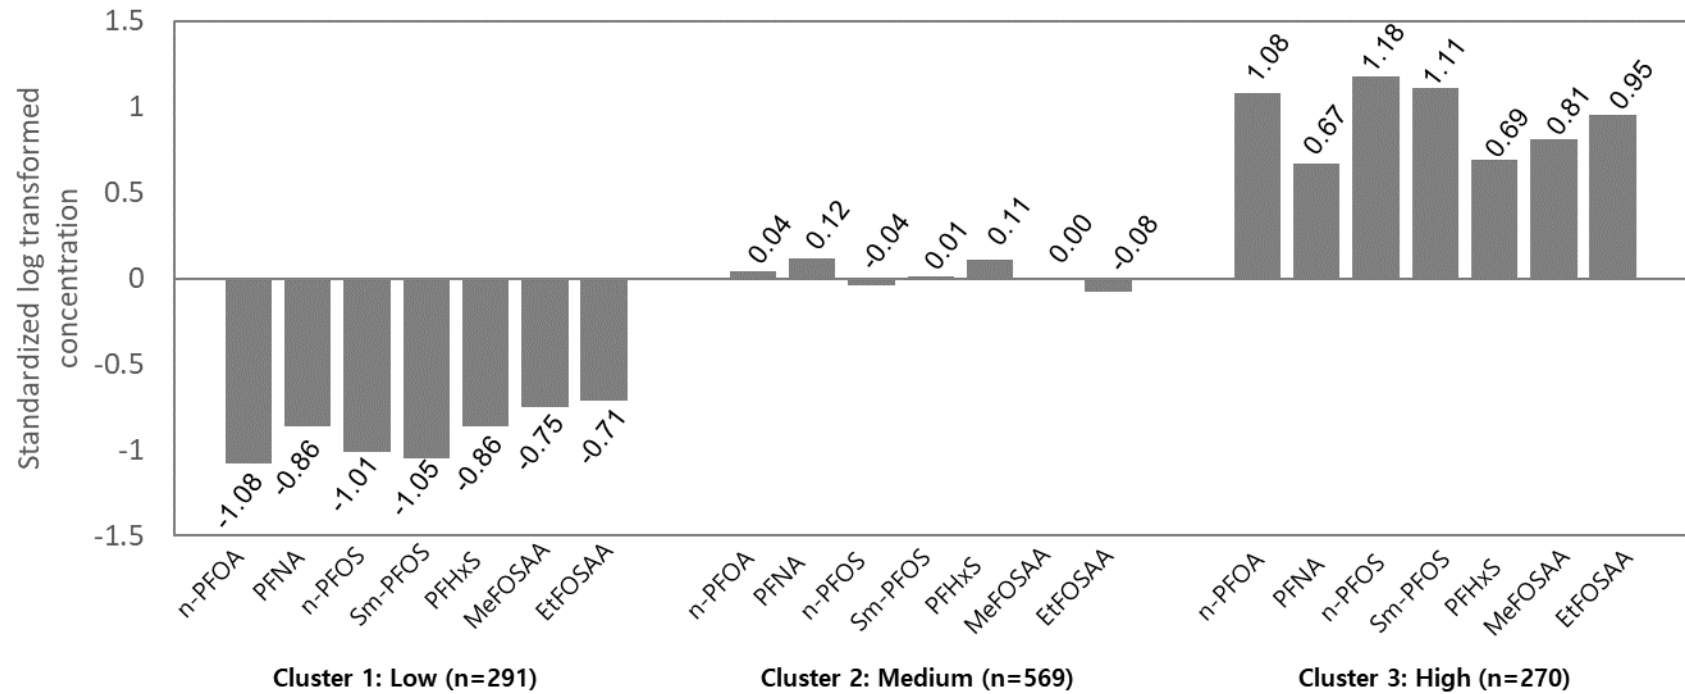

**Figure S4.** Means of the standardized log-transformed serum PFAS concentrations in each cluster identified by k-means clustering in the SWAN-MPS cohort (1999–2016, n = 1130). Cluster 1 (n=291): “low” overall PFAS concentration pattern; clusters 2 (n=569): “medium” overall PFAS concentration pattern; cluster 3 (n=270): “high” overall PFAS concentration pattern.

## References

- Andersen ME, Hagenbuch B, Apte U, Corton JC, Fletcher T, Lau C, et al. 2021. Why is elevation of serum cholesterol associated with exposure to perfluoroalkyl substances (PFAS) in humans? A workshop report on potential mechanisms. *Toxicology* 459:152845; doi:10.1016/j.tox.2021.152845.
- ATSDR. 2021. Toxicological Profile for Perfluoroalkyls.
- Canova C, Barbieri G, Zare Jeddi M, Gion M, Fabricio A, Daprà F, et al. 2020. Associations between perfluoroalkyl substances and lipid profile in a highly exposed young adult population in the Veneto Region. *Environment International* 145:106117; doi:10.1016/J.ENVINT.2020.106117.
- Château-Degat ML, Pereg D, Dallaire R, Ayotte P, Dery S, Dewailly É. 2010. Effects of perfluorooctanesulfonate exposure on plasma lipid levels in the Inuit population of Nunavik (Northern Quebec). *Environmental Research* 110:710–717; doi:10.1016/j.envres.2010.07.003.
- Cong J, Chu C, Li QQ, Zhou Y, (Min) Qian Z, Dee Geiger S, et al. 2021. Associations of perfluorooctane sulfonate alternatives and serum lipids in Chinese adults. *Environment International* 155; doi:10.1016/j.envint.2021.106596.
- Donat-Vargas C, Bergdahl IA, Tornevi A, Wennberg M, Sommar J, Koponen J, et al. 2019. Associations between repeated measure of plasma perfluoroalkyl substances and cardiometabolic risk factors. *Environment International* 124:58–65; doi:10.1016/J.ENVINT.2019.01.007.
- Dunder L, Lind PM, Salihovic S, Stubleski J, Kärrman A, Lind L. 2022. Changes in plasma levels of per- and polyfluoroalkyl substances (PFAS) are associated with changes in plasma lipids - A longitudinal study over 10 years. *Environmental Research* 211:112903; doi:10.1016/j.envres.2022.112903.
- Eriksen KT, Raaschou-Nielsen O, McLaughlin JK, Lipworth L, Tjønneland A, Overvad K, et al. 2013. Association between Plasma PFOA and PFOS Levels and Total Cholesterol in a Middle-Aged Danish Population. *PLoS ONE* 8:e56969; doi:10.1371/journal.pone.0056969.
- Fisher M, Arbuckle TE, Wade M, Haines DA. 2013. Do perfluoroalkyl substances affect metabolic function and plasma lipids?—Analysis of the 2007–2009, Canadian Health Measures Survey (CHMS) Cycle 1. *Environmental Research* 121:95–103; doi:10.1016/j.envres.2012.11.006.
- Fitz-Simon N, Fletcher T, Luster MI, Steenland K, Calafat AM, Kato K, et al. 2013. Reductions in serum lipids with a 4-year decline in serum perfluorooctanoic acid and perfluorooctanesulfonic acid. *Epidemiology* 24:569–576; doi:10.1097/EDE.0B013E31829443EE.
- Fragki S, Dirven H, Fletcher T, Grasl-Kraupp B, Bjerve Gützkow K, Hoogenboom R, et al. 2021. Systemic PFOS and PFOA exposure and disturbed lipid homeostasis in humans: what do we know and what not? *Critical Reviews in Toxicology* 51:141–164; doi:10.1080/10408444.2021.1888073.
- Li Y, Barregard L, Xu Y, Scott K, Pineda D, Lindh CH, et al. 2020. Associations between perfluoroalkyl substances and serum lipids in a Swedish adult population with contaminated drinking water. *Environmental Health: A Global Access Science Source* 19; doi:10.1186/s12940-020-00588-9.

- Lin PID, Cardenas A, Hauser R, Gold DR, Kleinman KP, Hivert MF, et al. 2019. Per- and polyfluoroalkyl substances and blood lipid levels in pre-diabetic adults—longitudinal analysis of the diabetes prevention program outcomes study. *Environment International* 129:343–353; doi:10.1016/j.envint.2019.05.027.
- Liu HS, Wen LL, Chu PL, Lin CY. 2018. Association among total serum isomers of perfluorinated chemicals, glucose homeostasis, lipid profiles, serum protein and metabolic syndrome in adults: NHANES, 2013–2014. *Environmental Pollution* 232:73–79; doi:10.1016/J.ENVPOL.2017.09.019.
- Olsen GW, Burriss JM, Burlew MM, Mandel JH. 2003. Epidemiologic assessment of worker serum perfluorooctanesulfonate (PFOS) and perfluorooctanoate (PFOA) concentrations and medical surveillance examinations. *J Occup Environ Med* 45:260–270; doi:10.1097/01.JOM.0000052958.59271.10.
- Sakr CJ, Leonard RC, Kreckmann KH, Slade MD, Cullen MR. 2007. Longitudinal study of serum lipids and liver enzymes in workers with occupational exposure to ammonium perfluorooctanoate. *J Occup Environ Med* 49:872–879; doi:10.1097/JOM.0B013E318124A93F.
- Steenland K, Tinker S, Frisbee S, Ducatman A, Vaccarino V. 2009. Association of Perfluorooctanoic Acid and Perfluorooctane Sulfonate With Serum Lipids Among Adults Living Near a Chemical Plant. *American Journal of Epidemiology* 170:1268–1278; doi:10.1093/aje/kwp279.
- Wang J, Zhang Y, Zhang W, Jin Y, Dai J. 2012. Association of Perfluorooctanoic Acid with HDL Cholesterol and Circulating miR-26b and miR-199–3p in Workers of a Fluorochemical Plant and Nearby Residents. *Environmental Science & Technology* 46:9274–9281; doi:10.1021/es300906q.
- Winqvist A, Steenland K. 2015. Modeled PFOA exposure and coronary artery disease, hypertension, and high cholesterol in community and worker cohorts. *Environmental Health Perspectives* 122:1299–1305; doi:10.1289/EHP.1307943.
- Wu J, Province MA, Coon H, Hunt SC, Eckfeldt JH, Arnett DK, et al. 2007. An investigation of the effects of lipid-lowering medications: genome-wide linkage analysis of lipids in the HyperGEN study. *BMC Genetics* 8:60; doi:10.1186/1471-2156-8-60.
